# Supplementary material for: Loss of growth homeostasis by genetic decoupling of cell division from biomass growth: implication for size control mechanisms
Source: PubMed Central journal article supplement (PMC4300492; doi:10.15252/msb.20145513), 2014-12-23

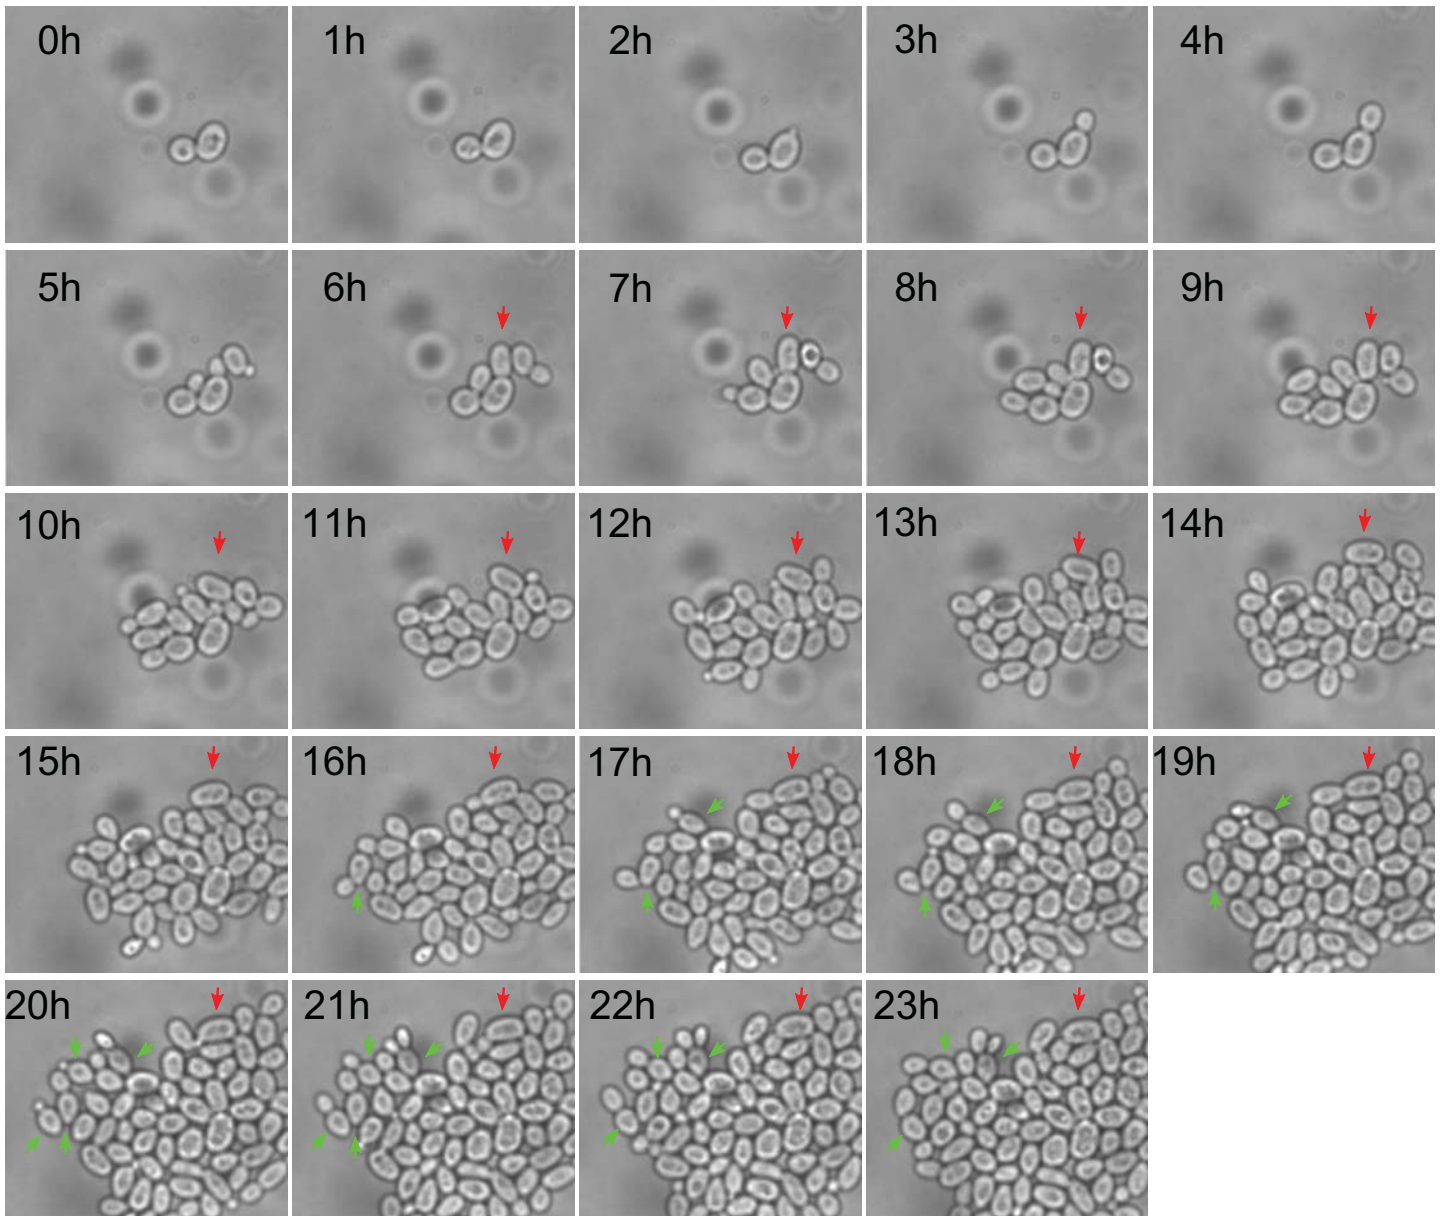

Supplement: msb0010-0769-sd3.pdf [file msb0010-0769-sd3.pdf]
