# Supplementary material for: Loss of growth homeostasis by genetic decoupling of cell division from biomass growth: implication for size control mechanisms
Source: PubMed Central journal article supplement (PMC4300492; doi:10.15252/msb.20145513), 2014-12-23

**A**

Transporterless

single-HXT2

Wildtype

with sensors no sensors

with sensors no sensors

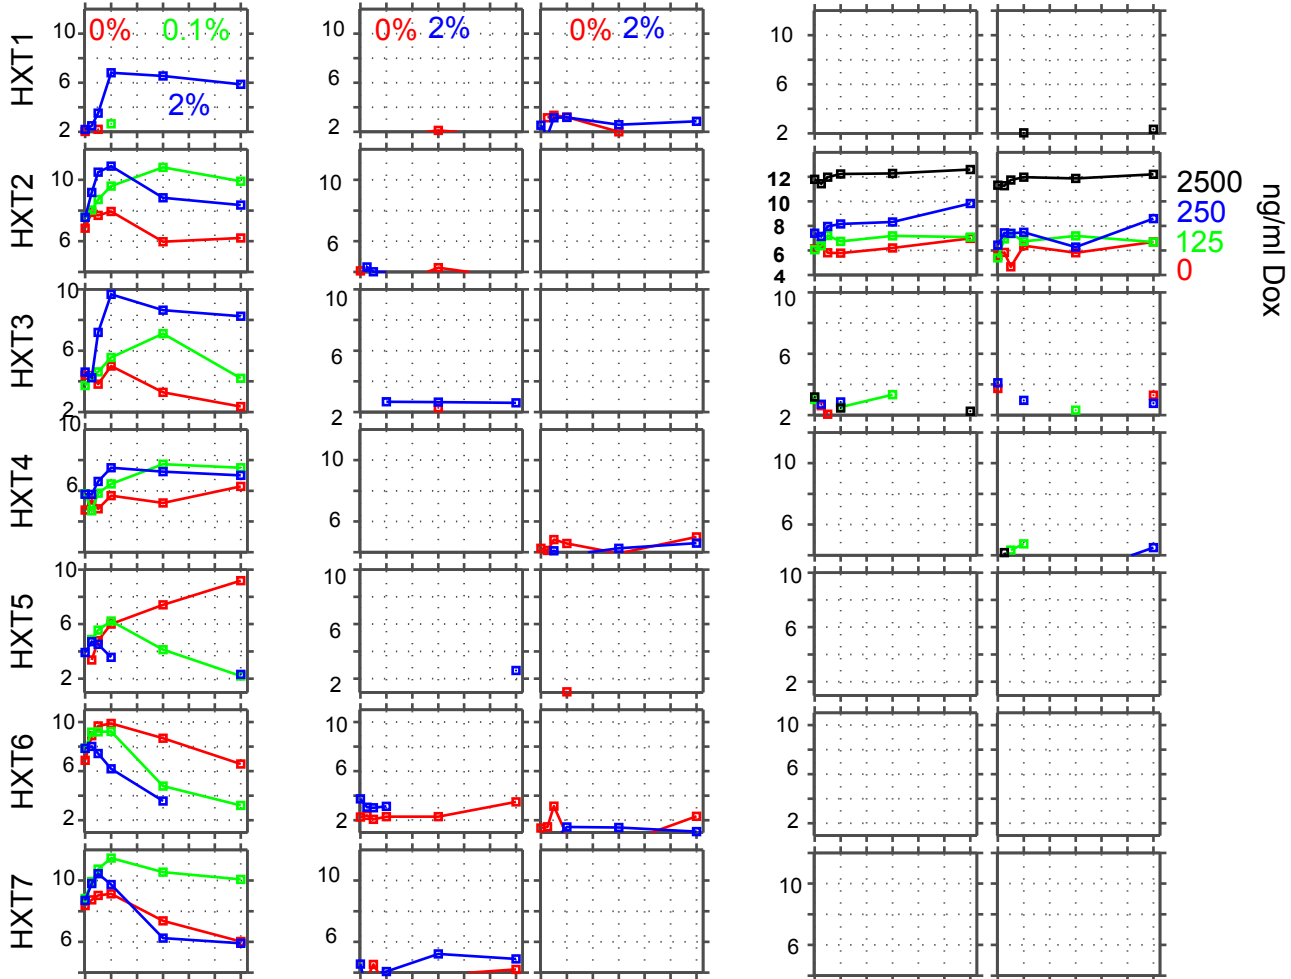

single-HXT4

with sensors no sensors

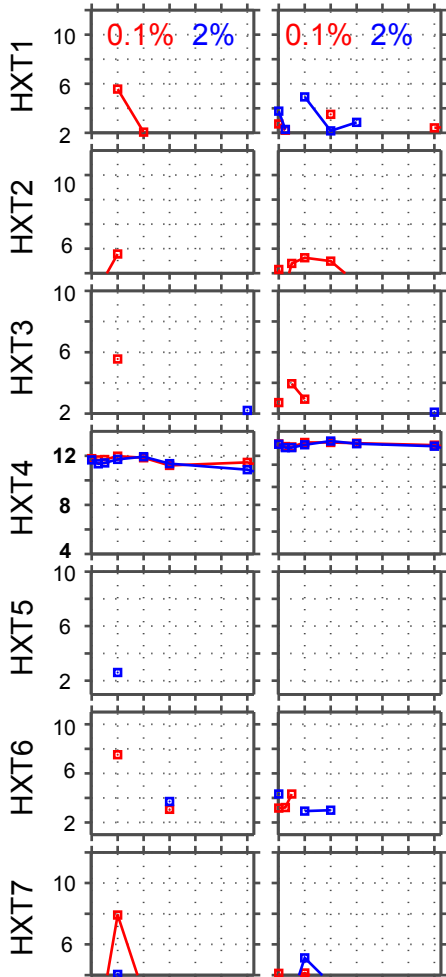**B**

single-HXT2

Wildtype

with sensors

no sensors

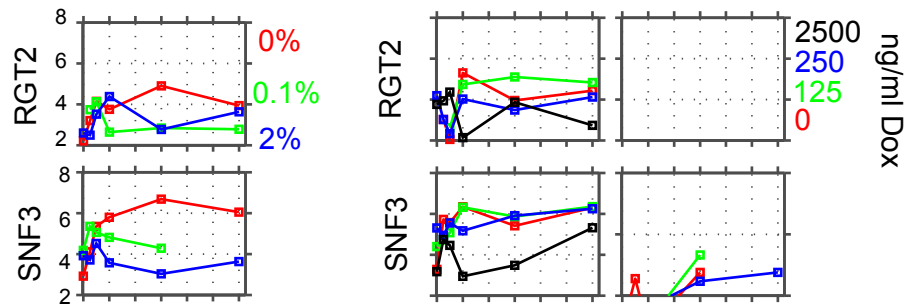

Transporterless

single-HXT4

with sensors

no sensors

with sensors

no sensors

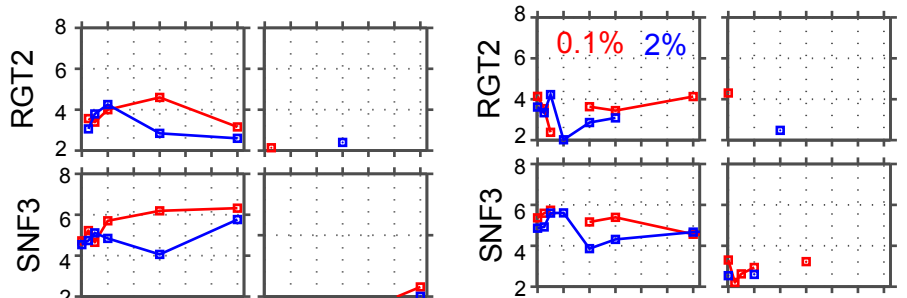

Supplement: msb0010-0769-sd12.pdf [file msb0010-0769-sd12.pdf]
