# Supplementary material for: Loss of growth homeostasis by genetic decoupling of cell division from biomass growth: implication for size control mechanisms
Source: Mol Syst Biol. 2014 Dec 23;10(12):769. doi: 10.15252/msb.20145513 (PMC4300492; doi:10.15252/msb.20145513)

A vertical color bar on the right side of the plot, indicating the density of states. The color scale ranges from 0 (dark blue) at the bottom to 4 (dark red) at the top. Numerical labels 0, 1, 2, 3, and 4 are placed to the right of the bar at regular intervals.

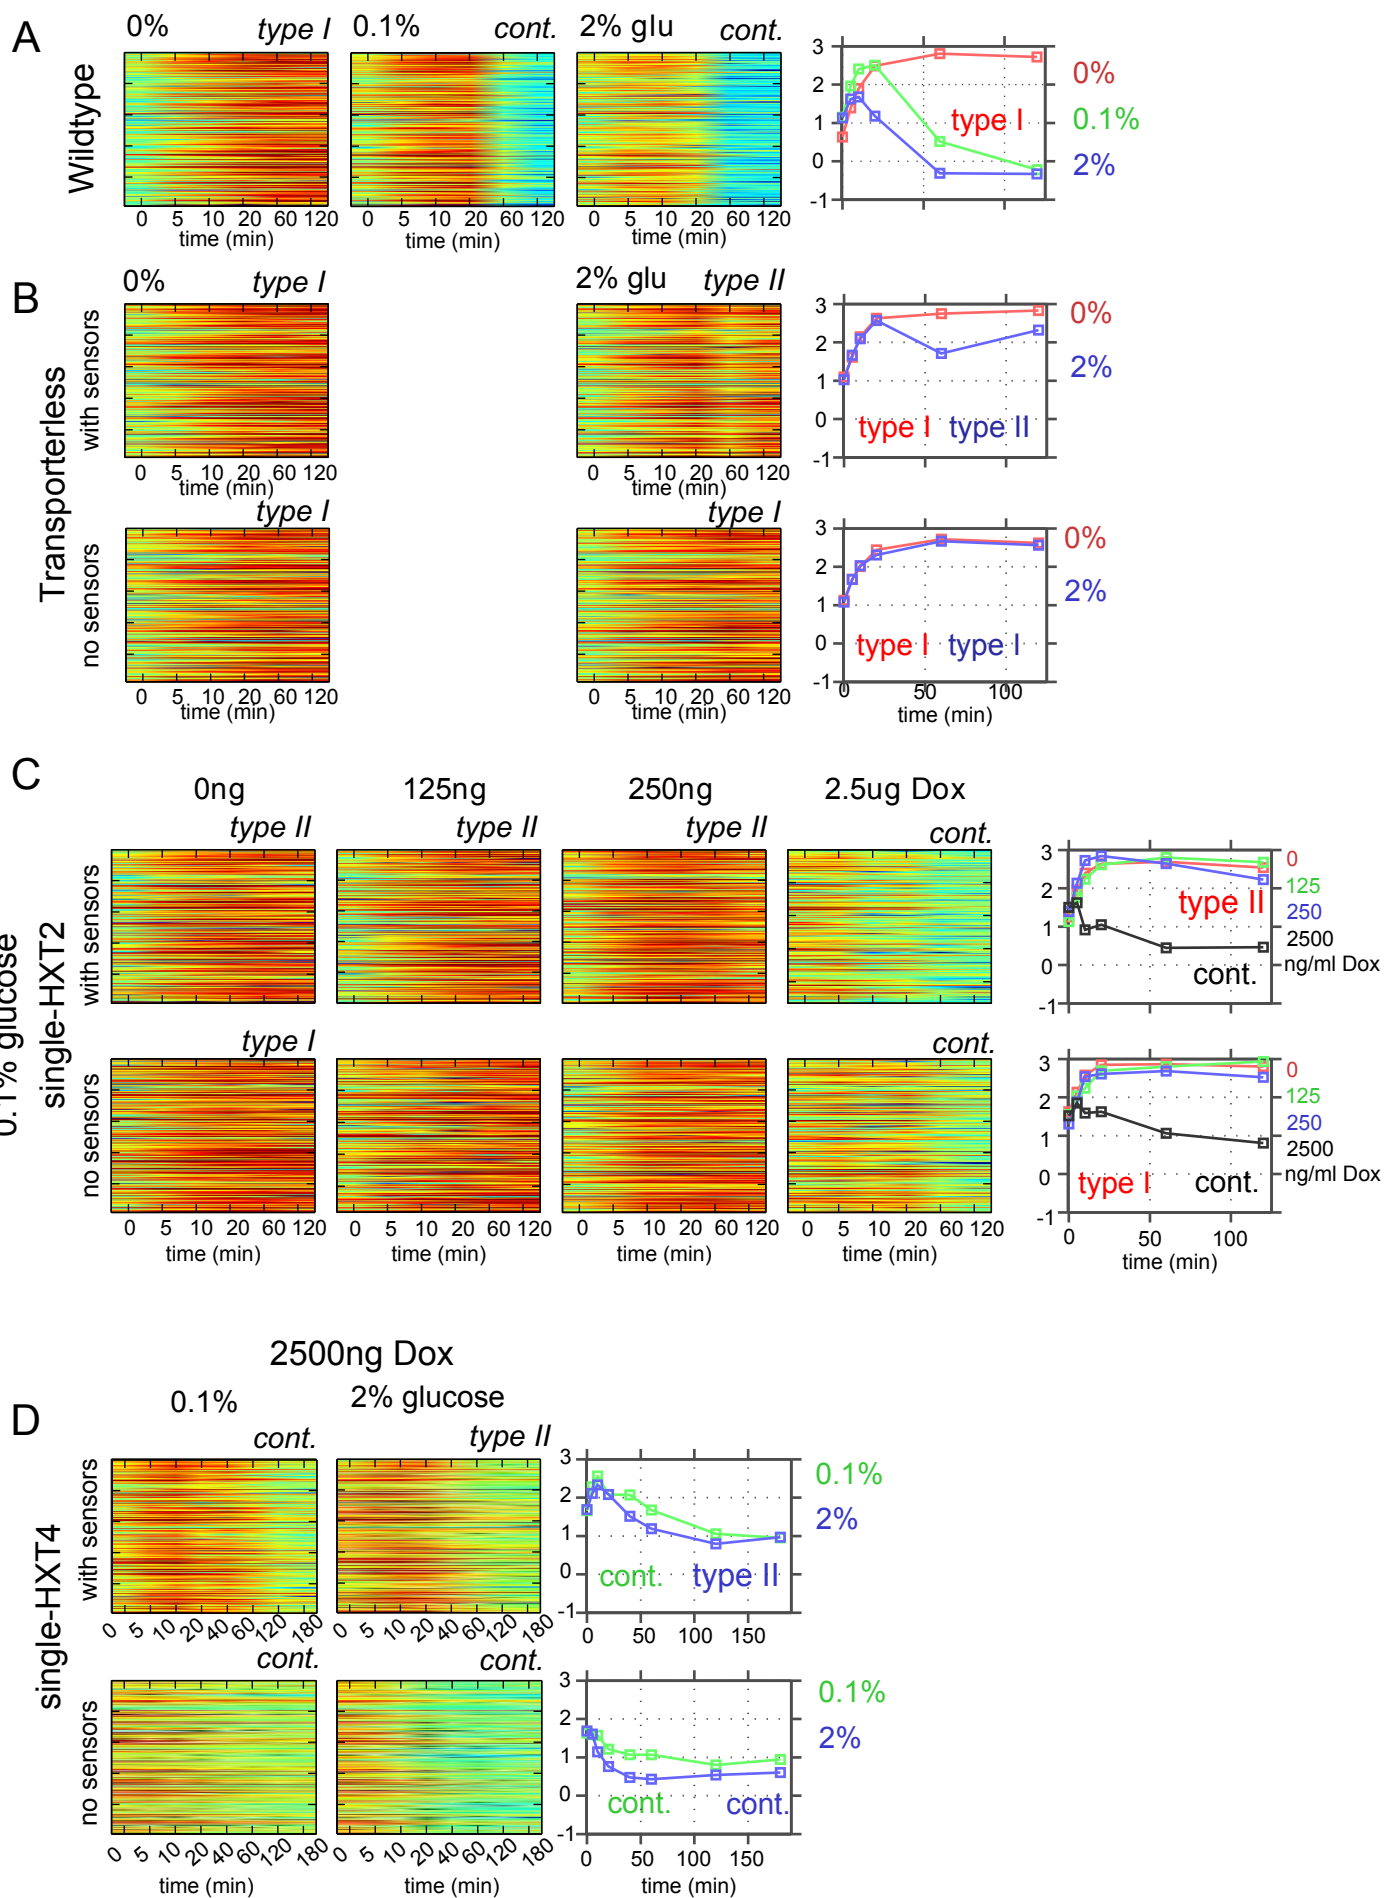

Supplement: Supplementary file 11 [file msb0010-0769-sd11.pdf]
